# Supplementary material
Source: Copernicus journal article supplement (doi:10.5194/egusphere-2026-3286)

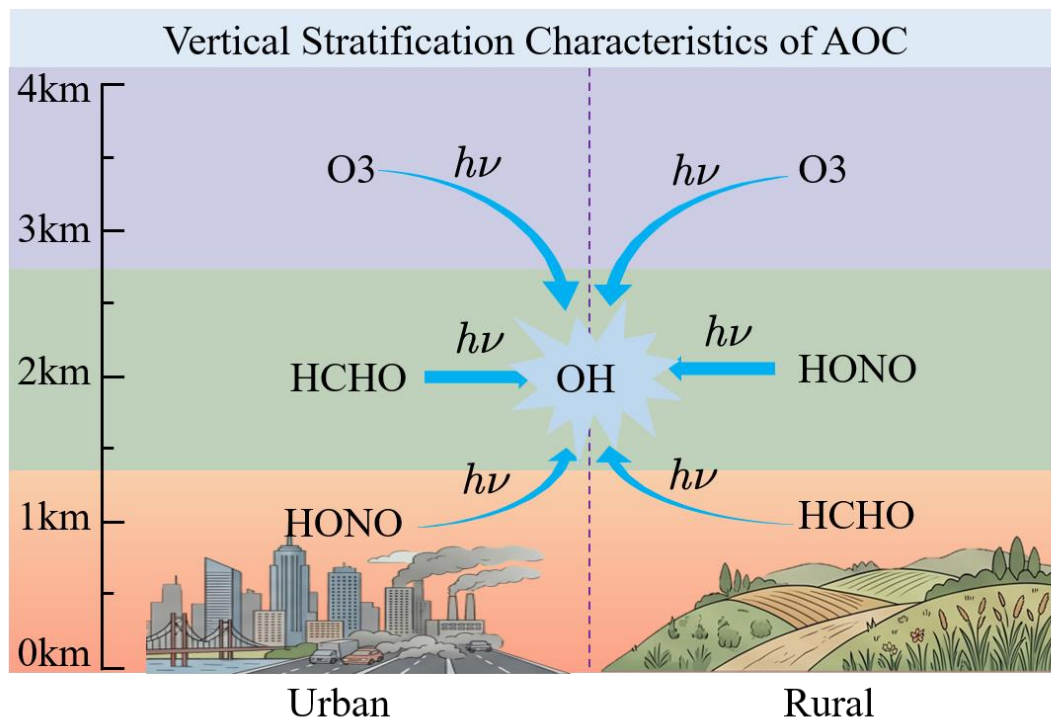

Supplement: Supplementary file 1 [file Abstract Graphic.pdf › Supplementary Information/Abstract Graphic.pdf]
